1 **Pathology of naturally acquired high pathogenicity avian influenza virus H5N1**  
2 **infection in seabirds**

3

4 Fabian ZX Lean<sup>1,6\*</sup>, Marco Falchieri<sup>2</sup>, Natalia Furman<sup>1</sup>, Glen Tyler<sup>3</sup>, Caroline  
5 Robinson<sup>4</sup>, Paul Holmes<sup>5</sup>, Scott M Reid<sup>2</sup>, Ashley C Banyard<sup>2</sup>, Ian H Brown<sup>2</sup>,  
6 Catherine Man<sup>5</sup>, Alejandro Núñez<sup>1</sup>

7 <sup>1</sup> Department of Pathology and Animal Sciences, Animal and Plant Health Agency  
8 (APHA), Weybridge KT15 3NB, Surrey, UK

9 <sup>2</sup> Department of Virology, APHA, Weybridge KT15 3NB, Surrey, UK

10 <sup>3</sup> NatureScot, Great Glen House, Leachkin Road, Inverness IV3 8NW, UK

11 <sup>4</sup> SRUC Veterinary Services, Sandpiper House, Ruthvenfield Road, Inveralmond  
12 Industrial Estate, Perth, PH1 3EE

13 <sup>5</sup> APHA Shrewsbury, Veterinary Investigation Centre, Shrewsbury SY1 4HD, UK

14 <sup>6</sup> Department of Pathobiology and Population Sciences, Royal Veterinary College,  
15 North Mymms, Hertfordshire, AL9 7TA, UK

16 \*Corresponding author: Fabian Lean ([flean22@rvc.ac.uk](mailto:flean22@rvc.ac.uk))

17

18 **Abstract**

19 The re-emergence of the high pathogenicity avian influenza virus (HPAIV) subtype  
20 H5N1 in the United Kingdom in 2021-2022 has caused unprecedented epizootic  
21 events in wild birds and poultry. During the summer of 2022 there was a shift in virus  
22 transmission dynamics resulting in increased HPAIV infection in seabirds and

23 consequently a profound impact on seabird populations. To understand the  
24 pathological impact of HPAIV in seabirds, we have evaluated the virus distribution  
25 and associated pathological changes in the tissues of great skua (*Stercorarius skua*,  
26 n=8), long tailed skua (*Stercorarius longicaudus*, n=1), European herring gull (*Larus*  
27 *argentatus*, n=5), and black-headed gull (*Chroicocephalus ridibundus*, n=4). Grossly  
28 there was gizzard ulceration in one great skua and pancreatic necrosis in four  
29 herring gulls, which were confirmed for virus infection *in situ* by  
30 immunohistochemistry. Microscopical analysis revealed neuro-, pneumo-, lymphoid-  
31 and cardiotropism of HPAIV H5N1, with the most common virus-associated  
32 pathological changes being pancreatic and splenic necrosis. Examination of the  
33 reproductive tract of the great skua revealed HPAIV-associated oophoritis and  
34 salpingitis, and virus replication within the oviductal epithelium. Across the birds,  
35 epitheliotropism was evident in the intestine, nasal turbinate, and trachea. This was,  
36 in contrast, not observed in the 2021 summer mortality event in great skuas and may  
37 be significant for the disease epidemiology observed in 2022. The emergence of  
38 HPAIV in seabirds, particularly during summer 2022, has challenged the dogma of  
39 HPAIV dynamics, posing a significant threat to wild bird life with potential  
40 implications to the reproductive performance of seabirds of conservation importance.

41

## 42 **Keywords**

43 High pathogenicity avian influenza virus, multisystemic tropism, reproductive  
44 pathology

45

## 46 **Introduction**

47 High pathogenicity avian influenza virus (HPAIV) H5N1 clade 2.3.4.4b has re-  
48 emerged in Europe and the United Kingdom (UK) during 2020-2021 and 2021-2022  
49 seasons (defined as start of each October) and has brought about a series of  
50 epizootic events in poultry and wild birds. The re-emergence of HPAIV H5N1 clade  
51 2.3.4.4.b in Europe and the UK during 2021-2022 has also contributed to the trans-  
52 Atlantic dissemination of virus into North America likely mediated through migratory  
53 wild birds.<sup>12</sup>

54 Conventionally it is understood that Anseriformes are the carrier for HPAIV during  
55 the winter period in Western Europe. However during the 2021-2022 HPAIV season  
56 in the UK, there was a shift in infection from Anseriformes predominating in the  
57 colder months to a series of explosive outbreaks in seabird species across the  
58 northern coast of Scotland during summer.<sup>4</sup> During summer 2021, infection with  
59 H5N1 was detected in great skuas<sup>6</sup> but those events, alongside sporadic small-scale  
60 outbreaks across northern Europe were the only cases of H5N1 reported during the  
61 summer months. In contrast during summer 2022, infection in great skuas  
62 (*Stercorarius skua*) was detected several months earlier than seen during 2021 and  
63 was followed by extensive outbreaks in a number of shorebird species (Order  
64 Charadriiformes).<sup>16</sup> High mortality events in seabirds including northern gannet, great  
65 skua and several species of gull species were observed.<sup>4,16</sup> Seabirds from the  
66 Laridae family have been previously associated with infection with low pathogenicity  
67 avian influenza virus (LPAIV).<sup>18,20,24,32,50</sup> However, a recent experimental model has  
68 demonstrated previous exposure of the European herring gulls with LPAIV H5N1 or  
69 H13N6 only confer partial protection to subsequent HPAIV H5N8 clade 2.3.4.4b  
70 challenge.<sup>46</sup>

71 Prior to the unusual increased in cases during summer 2022, HPAIV-associated  
72 disease in the Laridae has been sporadically reported in East Asia and Europe, often  
73 in small numbers.<sup>1,2,12,15,34,36,37,39</sup> More recently there has been an increased  
74 detection of HPAI positive seabirds or Charadriiformes,<sup>16,27</sup> and critically, mortality  
75 events in seabirds associated with HPAIV infection reported in the UK, Europe and  
76 North America.<sup>5,6,44</sup> Data collected through the avian influenza wild bird passive  
77 surveillance in Great Britain have shown a rise in high pathogenicity H5Nx positive  
78 birds within the *Laridae* family from 1.3% during the 2020-2021 season and up to  
79 15% within the 2021-2022 season. The potential maintenance of HPAIV in seabirds  
80 introduces further uncertainty on the transmission dynamics at both the local and  
81 global levels.

82 One of the hypotheses for the enzootic transmission of HPAIV in wild birds in Europe  
83 is the maintenance in wild birds during summer in Northern Europe.<sup>41</sup> Previously  
84 Anseriformes were thought to be responsible for transmission given potential virus  
85 adaptation in the host<sup>10,11</sup> but the expansion of avian taxa susceptibility for HPAIV  
86 and increased incidence of disease also challenges the status quo.

87 Here we evaluate the relationship between virus antigen distribution in tissues and  
88 the associated pathological changes in great skua (*Stercorarius skua*), long tailed  
89 skua (*Stercorarius longicaudus*), European herring gull (*Larus argentatus*), and  
90 black-headed gull (*Chroicocephalus ridibundus*) which succumbed to natural  
91 infection of HPAIV during summer of 2022 and comment upon the potential for these  
92 birds as reservoirs of infection.

93

## 94 **Materials and methods**

### 95 **Post-mortem examination**

96 Carcasses received at Scotland's Rural College, NatureScot or APHA regional  
97 laboratories were frozen for transport, and thawed for necropsy at APHA Weybridge.  
98 The herring gulls came from wildlife rehabilitation centres (Sussex and Cornwall),  
99 whereas other samples were retrieved from birds that have been submitted having  
100 being found dead in the wild. The great skuas carcasses originated from colonies on  
101 Shetland including Scatness (Mainland), Noss (Island), Noness (Mainland), and long  
102 tailed skua carcass originated from Clumlie (Mainland). Oropharyngeal (OP) and  
103 cloacal (C) swabs were tested to confirm infection status with HPAIV H5N1 by  
104 standard tests as described previously.<sup>35</sup> Major organs were fixed in 10% neutral  
105 buffered formalin for microscopic evaluation.

### 106 **Histopathology and immunohistochemistry**

107 Formalin fixed tissues samples were processed using routine histological methods  
108 into paraffin blocks. Tissues were sectioned at 4 µm thickness and stained with  
109 hematoxylin and eosin (H&E) for histological evaluation and immunohistochemical  
110 labelling using a monoclonal antibody against the nucleoprotein (NP) of influenza A  
111 virus for the detection of influenza viral antigen as described previously.<sup>38</sup> The  
112 tissues were assessed on conventional light microscope for histopathology: Absent -,  
113 minimal +, mild ++, moderate +++, severe ++++; and abundance of virus antigens:  
114 Absent -, rare +, scattered ++, confluent +++, abundant ++++.<sup>6</sup>

## 115 **Results**

### 116 **Post-mortem findings**

117 The clinical disease reported in the captive herring gulls included cyanotic heads,  
118 gasping, muscle twitching, diarrhoea, and sudden deaths. Other birds obtained from  
119 the wild were found dead.

120 All submitted birds were in good body condition. On necropsy, the great skuas (n=8,  
121 6 females and 2 males) were moderately autolysed. Only one of the birds had  
122 multifocal, approximately 1 to 2mm diameter, red to brown ulcers at the  
123 proventricular-gizzard junction (**Figure 1a**). The long tailed skua (n=1, male) was  
124 moderately autolysed and otherwise unremarkable. For the herring gulls (n=5, 2  
125 male and 3 gender not determined) were mildly autolysed. Post-mortem examination  
126 findings included multifocal faint tan areas in the pancreatic parenchyma (n=4;  
127 **Figure 1b**), suggestive of necrosis, mild splenomegaly (n=3), and intestinal  
128 nematodiasis (n=1), A black headed gull (n=1, 2 male and 2 gender not determined)  
129 was examined but was unremarkable and with severe autolysis.

### 130 **Histopathology and viral immunohistochemistry**

131 In the great skuas, virus antigen was consistently detected in the heart, brain,  
132 kidney, lung, and pancreas of all birds examined (**Table 1**). The pancreas was  
133 particularly severely affected, with moderate to severe areas of confluent necrosis.  
134 These necrotic areas correlated with moderate to abundant distribution of virus  
135 antigens in all skuas examined (**Figure 2a**; n=8/8). Correlative viral IHC and  
136 histology also revealed viral-associated myocardial necrosis (**Figure 2b**, n=2/8),  
137 splenic necrosis (**Figure 2c**; n=3/4), and renal tubular necrosis (**Figure 2d**; n=5/8). In  
138 the proventriculus of a great skua where ulceration was noted at post-mortem

139 **(Figure 1a)**, histological and IHC examination confirmed immunolabelling of the  
140 mucosa **(Figure 3a)** and glandular epithelium **(Figure 3b)**. The mucosal damage  
141 was extensive and was replaced with necrotic cellular debris, degenerated  
142 heterophils and fibrin deposition **(Figure 3a, b)**. Similar proventricular mucosa  
143 damage was also observed histologically in other two great skuas where lesions  
144 were not observed grossly. Nevertheless, viral immunolabelling in the proventriculus  
145 (n=6/8) and gizzard (n=5/8) were more common than histopathological changes  
146 (n=1, 3/8; respectively). Only one long tailed skua was examined, which revealed  
147 severe pancreatic necrosis and mild splenic necrosis **(Table 1)**.

148 The reproductive tract was only available for examination from the great skuas. Virus  
149 antigens were detected in the ovaries (n=6/6) and oviducts (n=5/5) but not in the  
150 testis (n=0/2). In the ovaries, there was confluent distribution of viral antigens  
151 **(Figure 3c)**, being predominantly present in the theca interna and occasionally  
152 transmural of the pre-ovulatory follicles. This was associated with necrosis within the  
153 tunica interna and blood vessels of the stroma, and the stromal wall was moderately  
154 to markedly expanded with lymphoplasmacytic cells and fibrin deposits **(Figure 3d)**.  
155 In the oviduct, there was a moderate amount of intra-luminal debris, ulcerated  
156 mucosa, and heterophilic and lymphocytic infiltration of submucosa wall observed.  
157 Virus antigens were present in the debris **(Figure 3e)**, remaining mucosa epithelium  
158 and submucosal cells **(Figure 3f)**.

159 In the herring gulls, viral antigen was found in the brain (n=4/5), lung (n=5/5),  
160 pancreas (n=5/5), nasal turbinate (n=3/4). Lesions that were consistently associated  
161 with viral antigens include the pancreas (n=5/5), brain (n=4/5) and nasal turbinate  
162 (n=3/4). Pancreas necrosis was multifocal to confluent acinar necrosis **(Figure 4a)**.  
163 In the spleen mild lymphoid depletion was observed **(Figure 4b)**. In the brains, there

164 was mild neuronal necrosis and dispersed degenerated heterophils within the  
165 neuropil, and in the cerebellum, there was occasional loss of Purkinje cells attributed  
166 to viral infection (**Figure 4c**). In the lungs, there were mild to moderate air capillary  
167 necrosis and occasionally fibrin deposition in air capillary walls. Rhinitis ranged from  
168 mild changes including scant neutrophilic exudate with occasional intra-epithelial  
169 neutrophils, or in severe damage with abundant exudation, complete loss of mucosa  
170 with submucosa necrosis and fibrins deposition (**Figure 4d**). Incidental findings  
171 included presence of intestinal cestode and proventricular nematode in two separate  
172 herring gulls but not associated with overt intestinal pathology.

173

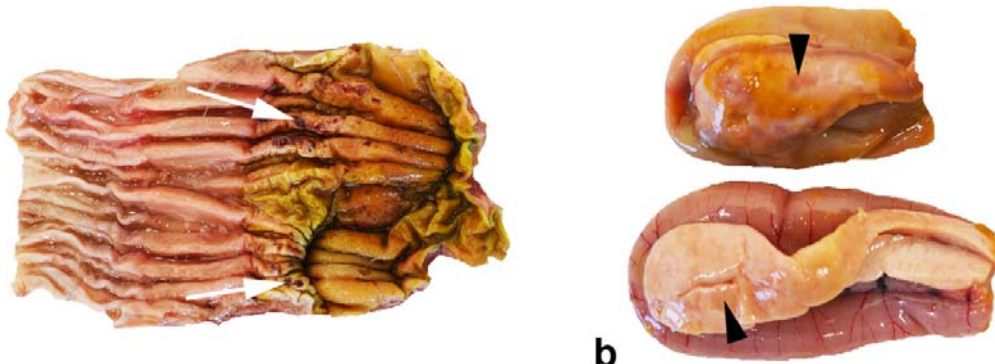

174 **a**  
175 **Figure 1. Gross lesions of HPAIV H5N1 infected seabirds.** Multifocal areas of  
176 dark red depression (white arrow) on the mucosa of the proventricular-gizzard  
177 junction (a), great skua (*Stercorarius skua*). Multifocal to coalescing pale tan areas in  
178 the pancreas consistent with necrosis (b), European herring gull (*Larus argentatus*).

179



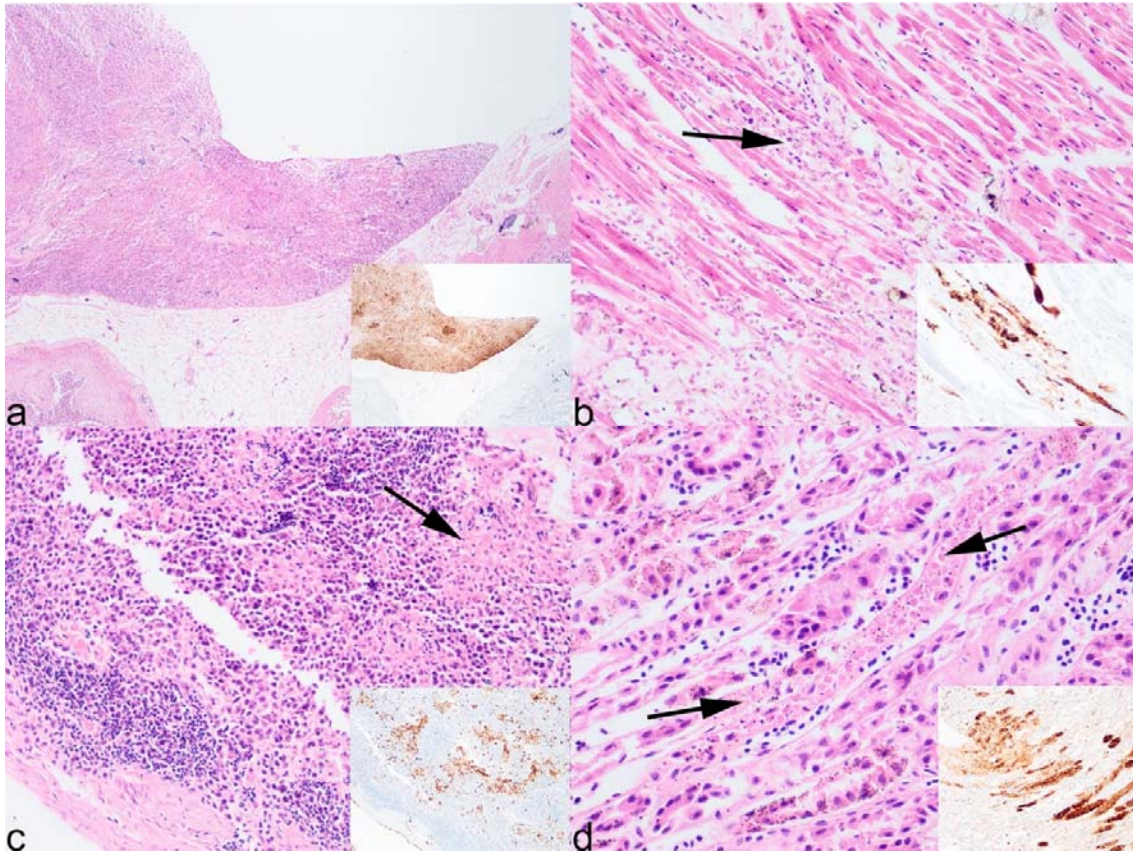

180

181

**Figure 2. Microscopic findings of great skua (*Stercorarius skua*) infected with**

182

**HPAIV H5N1. Severe, confluent, pancreatic necrosis (a). Moderate, multifocal,**

183

**myocardial necrosis (b). Mild, multifocal, splenic necrosis (c). Mild, multifocal, renal**

184

**tubular necrosis (d). Co-localisation of virus antigens with areas of necrosis in**

185

**various tissues (a-d, insets). Arrows indicate area of necrosis. Histological images**

186

**were taken at 40x (a), 200x (d) and 400x (b, c) and immunohistochemical insets**

187

**were taken at 40x (a), 200x (b, c) and 400x (d).**

188



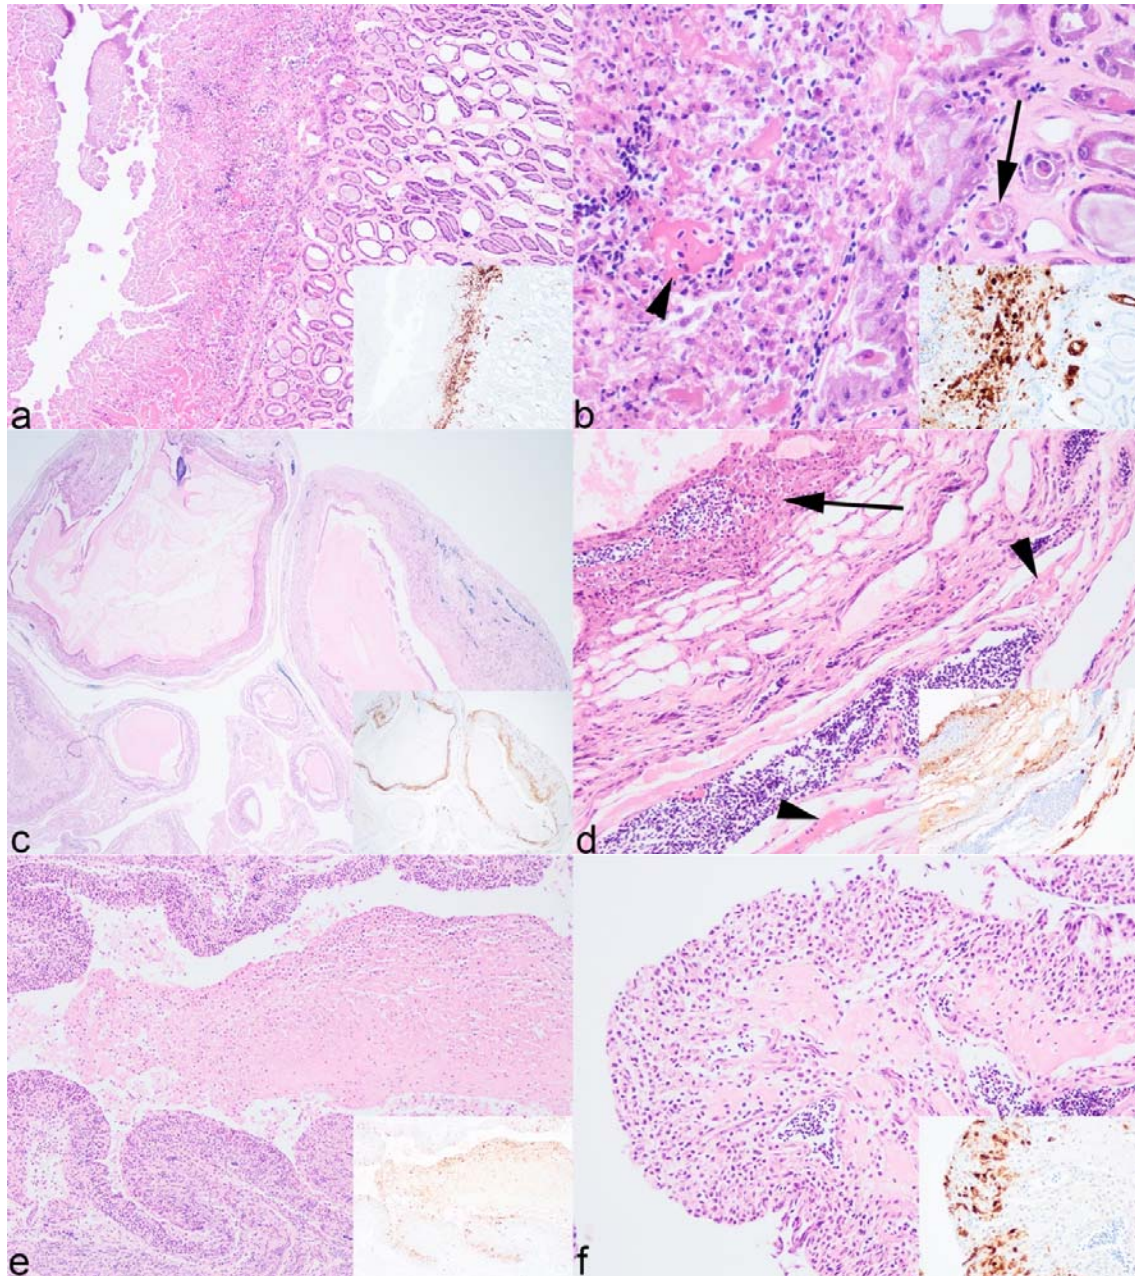

189  
190

**Figure 3. Microscopic findings of great skua (*Stercorarius skua*) infected with**

191 **HPAIV H5N1.** (a and b) Moderate, focal, gizzard necrosis and fracturing of koilin (a),  
192 with evidence of mucosa epithelial degeneration (arrow), and deposition of cellular  
193 debris, degenerated heterophils, extravasated erythrocytes, and fibrin (arrowhead)  
194 within disrupted koilin layer (b). Moderate, diffuse, oophoritis (c) characterised by  
195 necrosis of theca interna (arrow) and stroma, and with fibrin deposition within the  
196 mural typically around blood vessels (d, arrowhead). Moderate necrotising



197 salpingitis, with abundant intra-luminal debris (e) and mucosa is eroded and  
198 infiltrated with heterophils and lymphocytes (f). Co-localisation of virus antigens with  
199 areas of necrosis in various tissues (a-f) and intra-luminal debris in the oviduct (e)  
200 (insets). Arrows indicate area of necrosis. Histopathology images were taken at 20x  
201 (c), 100x (e), 200x (a, d, f), and 400x (b) magnifications and immunohistochemical  
202 insets were taken at 20x (c), 100x (a, e), 200x (d) and 400x (b, f) magnifications.

203

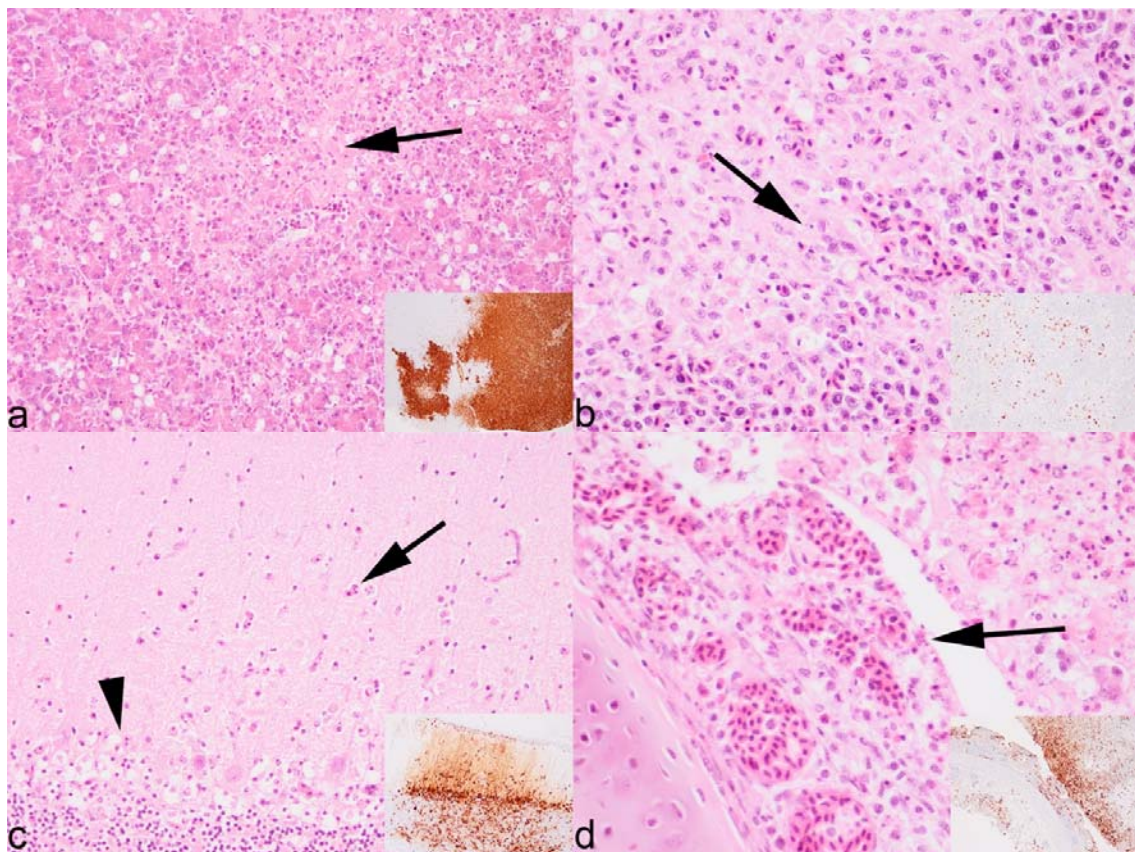

204

205

**Figure 4. Microscopic findings of European herring gull (*Larus argentatus*)**

206 **infected with HPAIV H5N1.** Mild, multifocal, necrosis and vacuolar degeneration of  
207 the pancreatic acinar cells (a). Mild, multifocal necrosis of splenic white pulp (b).  
208 Minimal, multifocal, neuronal necrosis with scattered heterophils in neuropil (arrow)  
209 and loss of Purkinje cells, cerebellum (arrowhead) (c). Severe, confluent, necrotising

210 rhinitis with extensive loss of epithelial layer (arrow), abundant exudation and  
211 infiltration of heterophils and lymphocytes in submucosa (d). Histopathology images  
212 were taken at 200x (a, c) and 400x HE (b, d) magnifications and  
213 immunohistochemical insets at 40x IHC (a) and 100x IHC (b, c, d) magnifications.

214

215

216 **Table 1. Summary of histopathology and viral immunohistochemistry findings.**

| Tissue          | Great Skua (n=8)<br><i>Stercorarius skua</i> |             |                  |             | Long tailed skua (n=1)<br><i>Stercorarius longicaudus</i> |       |           |       | European herring gull (n=5)<br><i>Larus argentatus</i> |           |           |            | Black-headed gull (n=4)<br><i>Chroicocephalus ridibundus</i> |       |           |            |
|-----------------|----------------------------------------------|-------------|------------------|-------------|-----------------------------------------------------------|-------|-----------|-------|--------------------------------------------------------|-----------|-----------|------------|--------------------------------------------------------------|-------|-----------|------------|
|                 | Histopathology <sup>a</sup>                  |             | IHC <sup>b</sup> |             | Histopathology                                            |       | IHC       |       | Histopathology                                         |           | IHC       |            | Histopathology                                               |       | IHC       |            |
|                 | n (%)                                        | Grade       | n (%)            | Grade       | n (%)                                                     | Grade | n (%)     | Grade | n (%)                                                  | Grade     | n (%)     | Grade      | n (%)                                                        | Grade | n (%)     | Grade      |
| Skin            | 0/8 (0)                                      | -           | 5/8 (63)         | +           | 0/1 (0)                                                   | -     | 1/1 (100) | +     | 0/4 (0)                                                | -         | 0/4 (0)   | -          | 0/4 (0)                                                      | -     | 1/4 (25)  | +          |
| Skeletal muscle | 0/8 (0)                                      | -           | 7/8 (88)         | +           | 0/1 (0)                                                   | -     | 1/1 (100) | ++    | 0/5 (0)                                                | -         | 5/5 (100) | +          | 1/3 (33)                                                     | +     | 3/3 (100) | + to ++    |
| Heart           | 2/8 (25)                                     | +           | 8/8 (100)        | + to +++    | 0/1 (0)                                                   | -     | 1/1 (100) | ++++  | 1/5 (20)                                               | ++        | 5/5 (100) | + to ++    | 0/4 (0)                                                      | -     | 4/4 (100) | + to ++++  |
| Brain           | 3/8 (38)                                     | + to ++     | 8/8 (100)        | + to ++++   | 0/1 (0)                                                   | -     | 1/1 (100) | +++   | 4/5 (80)                                               | ++        | 5/5 (100) | ++ to ++++ | 1/4 (25)                                                     | +     | 4/4 (100) | ++ to ++++ |
| Spleen          | 3/4 (75)                                     | ++          | 3/4 (75)         | ++ to ++++  | 1/1 (100)                                                 | ++    | 1/1 (100) | ++++  | 4/5 (80)                                               | +         | 5/5 (100) | + to ++    | n/a                                                          | n/a   | n/a       | n/a        |
| Kidney          | 5/8 (63)                                     | +           | 8/8 (100)        | + to ++     | 0/1 (0)                                                   | -     | 1/1 (100) | ++++  | 0/5 (0)                                                | -         | 3/5 (60)  | +          | 1/1 (100)                                                    | +     | 1/1 (100) | ++         |
| Nasal turbinate | n/a                                          | n/a         | n/a              | n/a         | n/a                                                       | n/a   | n/a       | n/a   | 4/4 (100)                                              | + to ++++ | 3/4 (75)  | ++ to +++  | n/a                                                          | n/a   | n/a       | n/a        |
| Trachea         | 0/8 (0)                                      | -           | 5/8 (63)         | 1 to ++     | 0/1 (0)                                                   | -     | 1/1 (100) | ++    | 3/3 (100)                                              | + to ++   | 3/3 (100) | +          | n/a                                                          | n/a   | n/a       | n/a        |
| Lung            | 1/8 (13)                                     | +           | 8/8 (100)        | + to ++++   | 1/1 (100)                                                 | +     | 1/1 (100) | ++++  | 3/5 (60)                                               | +         | 5/5 (60)  | + to ++++  | 1/2 (50)                                                     | +++   | 2/2 (100) | ++++       |
| Proventriculus  | 3/8 (38)                                     | + to +++    | 6/8 (75)         | + to ++     | n/a                                                       | n/a   | n/a       | n/a   | 0/5 (0)                                                | -         | 1/5 (20)  | +          | 0/4 (0)                                                      | -     | 2/4 (50)  | + to ++    |
| Gizzard         | 1/8 (13)                                     | ++          | 5/8 (63)         | + to ++     | 0                                                         | ++    | 1/1 (100) | ++    | 1/5 (20)                                               | +         | 1/5 (20)  | ++         | 0/3 (0)                                                      | -     | 3/3 (100) | +          |
| Liver           | 2/8 (25)                                     | + to ++     | 7/8 (88)         | + to ++     | 1/1 (100)                                                 | +     | 1/1 (100) | ++++  | 3/5 (60)                                               | + to ++   | 4/5 (80)  | + to ++    | 1/3 (33)                                                     | +     | 1/3 (33)  | ++         |
| Pancreas        | 8/8 (100)                                    | +++ to ++++ | 8/8 (100)        | +++ to ++++ | 1/1 (100)                                                 | ++++  | 1/1 (100) | +++   | 5/5 (100)                                              | + to ++++ | 5/5 (100) | ++ to ++++ | n/a                                                          | n/a   | n/a       | n/a        |
| Duodenum        | 1/8 (13)                                     | +           | 5/8 (63)         | + to ++     | n/a                                                       | n/a   | n/a       | n/a   | 2/5 (40)                                               | +         | 3/5 (60)  | + to ++    | n/a                                                          | n/a   | n/a       | n/a        |
| Ovary           | 6/6 (100)                                    | + to +++    | 6/6 (100)        | + to ++++   | n/a                                                       | n/a   | n/a       | n/a   | n/a                                                    | n/a       | n/a       | n/a        | 0/4 (0)                                                      | -     | 4/4 (100) | +          |
| Oviduct         | 5/5 (100)                                    | + to +++    | 5/5 (100)        | ++ to +++   | n/a                                                       | n/a   | n/a       | n/a   | n/a                                                    | n/a       | n/a       | n/a        | n/a                                                          | n/a   | n/a       | n/a        |
| Testis          | 0/2 (0)                                      | -           | 0/2 (0)          | -           | 0/1 (0)                                                   | -     | 1/1 (100) | ++    | n/a                                                    | n/a       | n/a       | n/a        | n/a                                                          | n/a   | n/a       | n/a        |

217 <sup>a</sup> Histopathology grade: Absent -, minimal +, mild ++, moderate +++, severe ++++

218 <sup>b</sup> Immunohistochemical grade: Absent -, rare +, scattered ++, confluent +++, abundant ++++

## 219 Discussion

220 During the 2020-2021 and 2021-2022 outbreaks of high pathogenicity avian  
221 influenza in the UK, there has been an increased detection of HPAIV H5N1 in  
222 seabirds of the Orders Suliformes and Laridae.<sup>3,6,16,34</sup> This investigation of naturally  
223 acquired infection revealed that gross pathology was limited to pancreatic necrosis in  
224 the herring gull and proventricular ulceration in the great skua. The pancreatic  
225 changes were less characteristic compared to that in Galliformes and Anseriformes  
226 and required immunohistochemical confirmation. Microscopic evaluation confirmed a  
227 multi-systemic HPAIV infection including neuro-, cardio, and pneumo-tropism, which  
228 may have been contributory to the mortalities seen. In addition, acute reproductive  
229 damage in female great skuas' was noted. Overall, seabirds are highly susceptible to  
230 developing pathologies in multiple organ systems following HPAIV infection.

231 Historically, gull species from the Order Laridae have been associated with infection  
232 with LPAIV including H11, H13 and H16 subtypes.<sup>24,32,50</sup> These infections have been  
233 predominantly associated with replication in epithelial cells of intestine that has been  
234 hypothesised to facilitate faecal-oral transmission in black headed gulls.<sup>25</sup> For  
235 HPAIV, natural infection has been reported in great skuas, European herring gulls,  
236 black-headed gulls, and great black-backed gulls (*Larus marinus*).<sup>1,2,6,12,15,34,37,39</sup> The  
237 most common and severe pathology in all birds examined was pancreatic necrosis  
238 associated with viral infection (except for in the black-headed gull where the  
239 pancreas was unavailable), followed by splenic necrosis and pneumonia (except in  
240 the long tailed skua). Such lesions are like those reported from experimentally  
241 challenged common gulls with H5N1, plus naturally infected black headed gulls and  
242 herring gulls, together with a recent report of naturally infected sandwich terns  
243 (*Thalasseus sandvicensis*).<sup>9,23,43,44,46</sup> Although RT-PCR was not conducted on

244 tissues from the current investigation, the abundance of virus antigens in the heart,  
245 brain, kidney, spleen, lung, pancreas, and liver strongly suggests the utility of these  
246 organs for diagnostic evaluation.

247 It has been proposed that the enterotropic adaptation of HPAIV in wild waterbirds  
248 has facilitated long term persistence and dissemination in these species with virus  
249 being maintained in stable equilibrium without undue pathological impact on the  
250 host.<sup>10,11</sup> In this report, we noted higher level of immunolabelling in the trachea,  
251 proventriculus, gizzard and duodenum in the great skua, and additionally antigens  
252 detected in the respiratory and enteric epithelium, which were generally absent in the  
253 previous GB epizootic in great skua in 2021.<sup>6</sup> Similar respiratory and enterotropism  
254 was observed in the long tailed skua, herring gull and black-headed gull in this study.  
255 The nasal turbinates were only examined in the herring gull which showed viral  
256 associated rhinitis and epitheliotropism. Previously, infection of the intestine had only  
257 been observed rarely with H5N1 clade 2.2 viruses in common gulls<sup>23</sup> and a laughing  
258 gull infected with an 'Eurasian-lineage' of H5N1.<sup>8</sup> Avian influenza viruses  
259 preferentially bind the  $\alpha$ -2,3 sialic acid residues.<sup>13</sup> Based on lectin histochemistry on  
260 other gull species including American herring gulls (*Larus smithsonianus*), laughing  
261 gulls (*Leucophaeus atricilla*) and ring-billed gulls (*Larus delawarensis*), the  
262 respiratory epithelium express both  $\alpha$ -2,3 and  $\alpha$ -2,6 sialic acids, whereas the  
263 intestinal tracts express predominantly  $\alpha$ -2,3 and rarely  $\alpha$ -2,6 sialic acids.<sup>19</sup>

264 The pathway of incursion in free-ranging seabirds is not understood but has been  
265 proposed to be either independent incursion or onward introductions from species  
266 movements between colonies and the movement of seabirds between mainland and  
267 islands particularly during the breeding season.<sup>16,44</sup> Herring gull and great skua can  
268 opportunistically predate or scavenge on other birds,<sup>16,26,31,51</sup> and this was observed

269 in the outbreak in gannet colonies. Further, contact transmission between common  
270 gulls (*Larus canus*) and European herring gulls have been documented previously  
271 with experimental infection with HPAIV H5N1 clade 2.2 and H5N8 clade 2.3.4.4b.<sup>23,46</sup>  
272 More recent HPAIV H5N1 outbreaks (June and August 2022) in wild bird rescue  
273 centres / hospitals in England (East Sussex and Cornwall) have been confirmed in  
274 herring gulls. After epidemiological assessment, the most likely source of infection  
275 appeared to be the introduction within the premises of infected / diseased herring  
276 gulls which had then transmitted the disease to the resident gulls of the same  
277 species within and among enclosures (APHA, unpublished data). It is not uncommon  
278 for skuas or gulls to congregate in high densities during the breeding season for  
279 nesting, feeding and bathing facilitate close contact. These behaviours could  
280 facilitate dissemination of HPAIV especially if virus replication is prominent in  
281 respiratory and intestinal tracts.<sup>16</sup> Infections through such contact can lead to birds  
282 from other colonies becoming exposed and infected, which then themselves spread  
283 virus to new localities and susceptible avian species. Further, these seabirds are  
284 often in areas with high seal populations plus other scavenging mammals that can  
285 predate on sick or dead birds, and result in exposures of other host population types  
286 to infectious materials either directly or indirectly through the environment.<sup>17</sup>

287 The distribution and ecology of seabird populations also challenge the current  
288 understanding of HPAIV transmission at a global level. Both long tailed skua and  
289 great skua are transitory migrant birds - long tailed skuas are a passage migrant in  
290 the UK and breed in Arctic region,<sup>22</sup> whereas great skuas migrate to the  
291 northernmost isles of the UK in summer for breeding and return to the coasts of  
292 Spain and Africa, and as far as Brazilian and Argentinian coasts for wintering.<sup>14,40</sup>  
293 Black-headed gulls are found across the UK,<sup>28</sup> and herring gulls are found



294 throughout the year around the UK coastline and inland around rubbish tips, fields,  
295 large reservoirs, and lakes, especially during the winter months.<sup>30</sup> Recent ring-  
296 recovery data revealed that great skua, European herring gulls and black-headed  
297 gulls migrate between Europe to Iceland and other North Atlantic islands, and to  
298 North America.<sup>12</sup> The pelagic and migratory nature of gulls have led to suggestion of  
299 intercontinental dissemination and shaping of influenza A virus evolution.<sup>21,24,42,48,52</sup>

300 Apart from the increased mortality in seabirds during 2022 which has resulted in an  
301 immediate impact upon populations, there is generally a significant deficit in  
302 knowledge on the impact of infectious diseases on population structures across  
303 these species. However, a trend towards a reduction in breeding abundance in the  
304 UK for herring gulls, black-headed gulls and great skuas has been noted.<sup>28-30</sup> The  
305 pathogenic mechanism of HPAIV on reproductive organs of wild bird is poorly  
306 documented. Previous reports have demonstrated epithelial labelling of virus antigen  
307 in the oviduct of common buzzards and peregrine falcons infected with HPAIV.<sup>49</sup> In  
308 domestic poultry, both HPAIV and LPAIV infection can lead to short to long term  
309 reduction in egg production or embryonic death because of viral-induced pathology  
310 on the ovaries, oviduct, or conceptus.<sup>7,33,45,47</sup> There has been an increased detection  
311 of reproductive pathologies in laying poultry, both Galliformes and Anseriformes,  
312 during the 2022 epizootic season in the UK which can be attributed to virus infection  
313 *in situ* (Lean F, unpublished). However, the impact on the poultry sector, where an  
314 abundance of eggs is produced daily, cannot be compared to seasonal reproductive  
315 cycle in seabirds and as such the longer-term impact on population densities for  
316 these species will require monitoring to assess population recovery.

317 In conclusion we demonstrate the susceptibility and pathology of a subset of Laridae  
318 and Suliformes following a naturally acquired infection with HPAIV H5N1 clade

319 2.3.4.4b. We associate rapid mortality with the observed multisystemic dissemination  
320 of viral antigen and resultant tissue damage. Reproductive pathology is also noted  
321 amongst the female great skua but the longer-term impact on population fecundity  
322 warrants further investigation.

323 **Acknowledgements**

324 The authors would like to thank the scientists at APHA for their laboratory work, and  
325 colleagues at Scotland's Rural College and NatureScot for the support.

326

327 **Conflict of interest statement**

328 The authors declare no conflict of interests.

329

330 **Funding sources**

331 This work was supported by the U.K. Department for Environment, Food, and Rural  
332 Affairs (Defra); the devolved administrations of the Scottish and the Welsh  
333 Governments [Grant Numbers SV3006, SV3032, SV3400, SE2213].

334

335 **Ethical statement**

336 No ethical approval was required as carcass and tissue were derived from diagnostic  
337 investigations.

338

339 **Author contribution statement**

340 F.Z.X.L., M.F., N.F., G.T., C.R., P.H., C.M. involved in conceptualisation of the  
341 investigations. F.Z.X.L., N.F. performed the necropsies. F.Z.X.L. conducted formal  
342 analysis. A.N., A.C.B., S.M.R., I.H.B., C.M. provided project leadership, financial,  
343 and laboratory resources. F.Z.X.L. wrote the original draft. All authors reviewed and  
344 edited the manuscript.

345 **References**

- 346 1 . Adlhoch C, Fusaro A, Gonzales JL, et al. Avian influenza overview February -  
347 May 2021. *EFSA journal European Food Safety Authority*. 2021; **19**: e06951.
- 348 2 . Adlhoch C, Fusaro A, Gonzales JL, et al. Avian influenza overview June -  
349 September 2022. *EFSA journal European Food Safety Authority*. 2022; **20**: e07597.
- 350 3 . Adlhoch C, Kuiken T, Monne I, et al. Avian influenza overview November 2018 -  
351 February 2019. *EFSA journal European Food Safety Authority*. 2019; **17**: e05664.
- 352 4 . APHA: Updated outbreak assessment #28 highly pathogenic avian influenza  
353 (HPAI) in the UK and Europe. 2022
- 354 5 . APHIS: 2022 detections of highly pathogenic avian influenza in wild birds. 2022
- 355 6 . Banyard AC, Lean FZX, Robinson C, et al. Detection of highly pathogenic avian  
356 influenza virus H5N1 clade 2.3.4.4b in great skuas: A species of conservation  
357 concern in Great Britain. *Viruses*. 2022; **14**.
- 358 7 . Bonfante F, Mazzetto E, Zanardello C, et al. A G1-lineage H9N2 virus with  
359 oviduct tropism causes chronic pathological changes in the infundibulum and a long-  
360 lasting drop in egg production. *Vet Res*. 2018; **49**: 83.
- 361 8 . Brown JD, Stallknecht DE, Beck JR, Suarez DL, Swayne DE. Susceptibility of  
362 North American ducks and gulls to H5N1 highly pathogenic avian influenza viruses.  
363 *Emerg Infect Dis*. 2006; **12**: 1663-1670.

364 9 . Brown JD, Stallknecht DE, Swayne DE. Experimental infections of herring gulls  
365 (*Larus argentatus*) with H5N1 highly pathogenic avian influenza viruses by intranasal  
366 inoculation of virus and ingestion of virus-infected chicken meat. *Avian pathology :  
367 journal of the WVPA*. 2008; **37**: 393-397.

368 10 . Caliendo V, Leijten L, Begeman L, et al. Enterotropism of highly pathogenic  
369 avian influenza virus H5N8 from the 2016/2017 epidemic in some wild bird species.  
370 *Veterinary Research*. 2020; **51**: 117.

371 11 . Caliendo V, Leijten L, van de Bildt M, et al. Tropism of highly pathogenic avian  
372 influenza H5 viruses from the 2020/2021 epizootic in wild ducks and geese. *Viruses*.  
373 2022; **14**: 280.

374 12 . Caliendo V, Lewis NS, Pohlmann A, et al. Transatlantic spread of highly  
375 pathogenic avian influenza H5N1 by wild birds from Europe to North America in  
376 2021. *Sci Rep*. 2022; **12**: 11729.

377 13 . de Graaf M, Fouchier RAM. Role of receptor binding specificity in influenza A  
378 virus transmission and pathogenesis. *The EMBO Journal*. 2014; **33**: 823-841.

379 14 . del Hoyo J, Elliott A, Sargatal J: Handbook of the birds of the world Lynx  
380 Edicions, Barcelona, Spain, 1996

381 15 . Ellis TM, Bousfield RB, Bissett LA, et al. Investigation of outbreaks of highly  
382 pathogenic H5N1 avian influenza in waterfowl and wild birds in Hong Kong in late  
383 2002. *Avian pathology : journal of the WVPA*. 2004; **33**: 492-505.

384 16 . Falchieri M, Reid SM, Ross CS, et al. Shift in HPAI infection dynamics causes  
385 significant losses in seabird populations across Great Britain. 2022; **191**: 294-296.

386 17 . Floyd T, Banyard AC, Lean FZX, et al. Encephalitis and death in wild mammals  
387 at a rehabilitation center after infection with highly pathogenic avian influenza  
388 A(H5N8) virus, United Kingdom. *Emerg Infect Dis*. 2021; **27**: 2856-2863.

389 18 . Fouchier RA, Munster VJ. Epidemiology of low pathogenic avian influenza  
390 viruses in wild birds. *Rev Sci Tech*. 2009; **28**: 49-58.

391 19 . França M, Stallknecht DE, Howerth EW. Expression and distribution of sialic  
392 acid influenza virus receptors in wild birds. *Avian Pathology*. 2013; **42**: 60-71.

393 20 . Gambaryan AS, Matrosovich TY, Boravleva EY, et al. Receptor-binding  
394 properties of influenza viruses isolated from gulls. *Virology*. 2018; **522**: 37-45.

395 21 . Gass Jr JD, Dusek RJ, Hall JS, et al. Global dissemination of influenza A virus is  
396 driven by wild bird migration through arctic and subarctic zones. *Molecular ecology*.  
397 **n/a**.

398 22 . Gilg O, Moe B, Hanssen SA, et al. Trans-equatorial migration routes, staging  
399 sites and wintering areas of a high-arctic avian predator: the long-tailed skua  
400 (*Stercorarius longicaudus*). *PLOS ONE*. 2013; **8**: e64614.

401 23 . Gulyaeva MA, Sharshov KA, Zaykovskaia AV, Shestopalova LV, Shestopalov  
402 AM. Experimental infection and pathology of clade 2.2 H5N1 virus in gulls. *Journal of*  
403 *veterinary science*. 2016; **17**: 179-188.

404 24 . Hill NJ, Bishop MA, Trovão NS, et al. Ecological divergence of wild birds drives  
405 avian influenza spillover and global spread. *PLOS Pathogens*. 2022; **18**: e1010062.

406 25 . Höfle U, Van de Bildt MW, Leijten LM, et al. Tissue tropism and pathology of  
407 natural influenza virus infection in black-headed gulls (*Chroicocephalus ridibundus*).  
408 *Avian pathology : journal of the WVPA*. 2012; **41**: 547-553.

409 26 . Ingraham LR, Oswald SA, Son E, Arnold JM. Opportunistic predation of birds by  
410 breeding Herring Gulls (*Larus argentatus*). *PLoS One*. 2020; **15**: e0239180.

411 27 . Jimenez-Bluhm P, Siegers JY, Tan S, et al. Detection and Phylogenetic Analysis  
412 of Highly Pathogenic A/H5N1 Avian Influenza Clade 2.3.4.4b Virus in Chile, 2022.  
413 2023: 2023.2002.2001.526205.

414 28 . JNCC: Black-headed gull (*Chroicocephalus ridibundus*). 2021

415 29 . JNCC: Great skua (*Stercorarius skua*). 2021

416 30 . JNCC: Herring gull (*Larus argentatus*). 2021

417 31 . Jones T, Smith C, Williams E, Ramsay A. Breeding performance and diet of  
418 Great Skuas *Stercorarius skua* and Parasitic Jaegers (Arctic Skuas) *S. parasiticus* on  
419 the west coast of Scotland. *Bird Study*. 2010; **55**: 257-266.

420 32 . Karamendin K, Kydyrmanov A, Zhumatov K, et al. Phylogenetic analysis of  
421 avian influenza viruses of H11 subtype isolated in Kazakhstan. *Virus Genes*. 2011;  
422 **43**: 46-54.

423 33 . Kinde H, Read DH, Daft BM, et al. The occurrence of avian influenza A subtype  
424 H6N2 in commercial layer flocks in Southern California (2000-02): clinicopathologic  
425 findings. *Avian Dis*. 2003; **47**: 1214-1218.

426 34 . Kleyheeg E, Slaterus R, Bodewes R, et al. Deaths among wild birds during  
427 highly pathogenic avian influenza A(H5N8) virus outbreak, the Netherlands. *Emerg*  
428 *Infect Dis*. 2017; **23**: 2050-2054.

429 35 . Lean FZX, Vitores AG, Reid SM, et al. Gross pathology of high pathogenicity  
430 avian influenza virus H5N1 2021-2022 epizootic in naturally infected birds in the  
431 United Kingdom. *One Health*. 2022; **14**: 100392.

432 36 . Li M, Liu H, Bi Y, et al. Highly pathogenic avian influenza A(H5N8) virus in wild  
433 migratory birds, Qinghai Lake, China. *Emerg Infect Dis*. 2017; **23**: 637-641.

434 37 . Liu J, Xiao H, Lei F, et al. Highly pathogenic H5N1 influenza virus infection in  
435 migratory birds. *Science*. 2005; **309**: 1206.



- 436 38 . Löndt BZ, Nunez A, Banks J, et al. Pathogenesis of highly pathogenic avian  
437 influenza A/turkey/Turkey/1/2005 H5N1 in Pekin ducks (*Anas platyrhynchos*)  
438 infected experimentally. *Avian pathology : journal of the WVPA*. 2008; **37**: 619-627.
- 439 39 . Madslie K, Moldal T, Gjerset B, et al. First detection of highly pathogenic avian  
440 influenza virus in Norway. *BMC Vet Res*. 2021; **17**: 218.
- 441 40 . Magnúsdóttir E, Leat EHK, Bourgeon S, et al. Wintering areas of great skuas  
442 *Stercorarius skua* breeding in Scotland, Iceland and Norway. *Bird Study*. 2012; **59**:  
443 1-9.
- 444 41 . Pohlmann A, King J, Fusaro A, et al. Has epizootic become enzootic? Evidence  
445 for a fundamental change in the infection dynamics of highly pathogenic avian  
446 influenza in Europe, 2021. *mBio*. 2022; **13**: e0060922.
- 447 42 . Postnikova Y, Treshchalina A, Boravleva E, et al. Diversity and reassortment  
448 rate of influenza A viruses in wild ducks and gulls. *Viruses*. 2021; **13**.
- 449 43 . Ramis A, van Amerongen G, van de Bildt M, et al. Experimental infection of  
450 highly pathogenic avian influenza virus H5N1 in black-headed gulls  
451 (*Chroicocephalus ridibundus*). *Vet Res*. 2014; **45**: 84.
- 452 44 . Rijks JM, Leopold MF, Kühn S, et al. Mass mortality caused by highly  
453 pathogenic influenza A(H5N1) virus in sandwich terns, the Netherlands, 2022.  
454 *Emerging Infectious Diseases*. 2022; **28**: 2538-2542.

455 45 . Stephens CB, Spackman E, Pantin-Jackwood MJ. Effects of an H7 highly  
456 pathogenic and related low pathogenic avian influenza virus on chicken egg  
457 production, viability, and virus contamination of egg contents and surfaces. *Avian*  
458 *Dis.* 2020; **64**: 143-148.

459 46 . Tarasiuk K, Kycko A, Knitter M, et al. Pathogenicity of highly pathogenic avian  
460 influenza H5N8 subtype for herring gulls (*Larus argentatus*): impact of homo- and  
461 heterosubtypic immunity on the outcome of infection. *Veterinary Research.* 2022; **53**:  
462 108.

463 47 . Uchida Y, Takemae N, Tanikawa T, Kanehira K, Saito T. Transmission of an  
464 H5N8-subtype highly pathogenic avian influenza virus from infected hens to laid  
465 eggs. *Avian Dis.* 2016; **60**: 450-453.

466 48 . Van Borm S, Rosseel T, Vangeluwe D, et al. Phylogeographic analysis of avian  
467 influenza viruses isolated from Charadriiformes in Belgium confirms intercontinental  
468 reassortment in gulls. *Archives of Virology.* 2012; **157**: 1509-1522.

469 49 . van den Brand JM, Krone O, Wolf PU, et al. Host-specific exposure and fatal  
470 neurologic disease in wild raptors from highly pathogenic avian influenza virus H5N1  
471 during the 2006 outbreak in Germany. *Vet Res.* 2015; **46**: 24.

472 50 . Verhagen JH, Majoor F, Lexmond P, et al. Epidemiology of influenza A virus  
473 among black-headed gulls, the Netherlands, 2006-2010. *Emerg Infect Dis.* 2014; **20**:  
474 138-141.

475 51 . Votier SC, Bearhop S, Crane JE, Manuel Arcos J, Furness RW. Seabird  
476 predation by great skuas *Stercorarius skua*– intra-specific competition for food?  
477 *Journal of Avian Biology*. 2007; **38**: 234-246.

478 52 . Wille M, Robertson GJ, Whitney H, et al. Extensive geographic mosaicism in  
479 avian influenza viruses from gulls in the northern hemisphere. *PLoS One*. 2011; **6**:  
480 e20664.

481
